# Supplementary material for: Determination of photovoltaic hydrogen production potential in Portugal: a techno-economic analysis
Source: Frontiers journal article supplement (doi:10.3389/fenrg.2024.1380543), 2024-07-18
Supplement: Table_1.xlsx [file Table_1.xlsx]

## Sheet: Used inputs 
	PV Plants economic assumptions	PV module cost	0,84 $/W
		Balance of the system cost	0.5
		O&M cost	0.05
	Electrolyzer technical and economic assumptions	Technology	PEM
		Efficieny	0.75
		Higher Heating Value of Hydrogen	39,4 kWh/kg
		Lifetime	7 years
		Electrolyzer specific energy requirement	52.5 kWh/kg
		Electrolyzer cost per unit	368 $/kW
		O&M costs	0.02
		Replacement cost	0.25
	Project lifetime	20 years
	Discount rate	0.06

## Sheet: Calculation results
	NameStation	Lat_dec	Lon_dec	Altitude	Optimun inclination (º)	Annual Electricity production (GWh)	Annual Hydrogen production (tons)	Annual Hydrogen production (kg/kWp)	LCOH2 ($/kg)	LCOH2 (€/kg*)
	Cabo Carvoeiro / Farol	39.3614	-9.40698	32	30.8594	198.543	3779.37	31.4947	4.33273	3.96372
	Sagres / Quartel da Marinha	37.0128	-8.94891	22.853	29.2388	230.451	4386.76	36.5563	3.79919	3.47561
	Lisboa / Geofísico	38.7191	-9.14972	77	30.4162	192.232	3659.25	30.4937	4.45923	4.07944
	Sines / Monte Chãos	37.9545	-8.83827	103	29.8886	206.128	3923.76	32.698	4.19093	3.83399
	Porto / Pedras Rubras	41.2323	-8.67911	69	32.1503	190.187	3620.3	30.1692	4.50204	4.1186
	Coimbra / Aeródromo	40.1576	-8.46852	171	31.4087	189.369	3604.73	30.0394	4.51942	4.1345
	Faro / Aeroporto	37.0166	-7.97191	5.003	29.2414	224.049	4264.89	35.5407	3.89406	3.5624
	Évora / Aeródromo	38.5365	-7.88797	247.558	30.2902	202.086	3846.82	32.0568	4.26516	3.9019
	Viseu / Aeródromo	40.7148	-7.89594	644.373	31.7932	194.168	3696.09	30.8007	4.41956	4.04314
	Beja	38.0257	-7.86732	246	29.9378	210.784	4012.39	33.4366	4.10894	3.75899
	Vila Real / Aeródromo	41.2742	-7.71711	561	32.1792	169.641	3229.2	26.91	4.98925	4.56432
	Penhas Douradas / Observatório	40.4114	-7.55865	1380	31.5838	205.288	3907.77	32.5648	4.20611	3.84788
	Castelo Branco	39.8394	-7.47869	386	31.1892	208.996	3978.35	33.1529	4.14	3.7874
	Portalegre	39.2942	-7.42132	597	30.813	192.121	3657.13	30.4761	4.46153	4.08155
	Bragança	41.8039	-6.74283	690	32.5447	192.02	3655.21	30.46	4.46363	4.08346
	Lisboa / Gago Coutinho	38.7662	-9.1275	103.884	30.4487	196.02	3731.35	31.0946	4.38232	4.00908
	Odemira / S.Teotónio	37.547	-8.72889	120.544	29.6074	210.007	3997.6	33.3133	4.12237	3.77127
	Vila Nova de Cerveira / Aeródromo	41.9731	-8.67621	34	32.6615	176.22	3354.44	27.9537	4.82086	4.41027
	Monção / Valinha	42.0734	-8.38097	80	32.7306	167.259	3183.87	26.5323	5.05345	4.62305
	Lamas de Mouro	42.043	-8.19875	880	32.7096	171.5	3264.6	27.205	4.94035	4.51958
	Montalegre	41.8228	-7.78789	1005	32.5577	169.846	3233.12	26.9426	4.98378	4.55932
	Ponte de Lima / Escola Agrícola	41.7638	-8.57139	40	32.517	168.378	3205.17	26.7098	5.02306	4.59525
	Chaves / Aeródromo	41.7252	-7.46541	360	32.4904	168.691	3211.13	26.7594	5.01463	4.58754
	Cabril / S. Lourenço	41.7097	-8.02699	585	32.4797	171.708	3268.56	27.238	4.93494	4.51463
	Braga / Merelim	41.5758	-8.45114	68.351	32.3873	178.321	3394.44	28.287	4.76971	4.36347
	Cabeceiras de Basto	41.489	-7.97955	350	32.3274	165.303	3146.64	26.222	5.10758	4.67257
	Mirandela	41.5148	-7.19084	250	32.3452	183.313	3489.47	29.0789	4.65287	4.25658
	Macedo de Cavaleiros / Izeda-Morais	41.5677	-6.78726	702	32.3817	192.706	3668.25	30.5688	4.44946	4.0705
	Miranda do Douro	41.4988	-6.27152	693	32.3342	193.602	3685.33	30.711	4.43106	4.05367
	Mogadouro	41.3351	-6.72629	644	32.2212	190.148	3619.56	30.163	4.50286	4.11935
	Carrazêda de Ansiães	41.243	-7.29933	715	32.1576	180.268	3431.5	28.5958	4.72337	4.32108
	Porto / S.Gens	41.1844	-8.64446	89.191	32.1173	200.023	3807.54	31.7295	4.30422	3.93763
	Moncorvo	41.1899	-7.01853	600	32.121	185.778	3536.39	29.4699	4.59749	4.20592
	Pinhão	41.1728	-7.54897	130	32.1092	168.8	3213.19	26.7766	5.01172	4.58487
	Luzim	41.1459	-8.249	287.174	32.0906	176.961	3368.55	28.0713	4.80268	4.39363
	Moimenta da Beira	40.9857	-7.60388	715	31.9801	175.69	3344.35	27.8696	4.83397	4.42226
	Trancoso / Bandarra	40.7812	-7.35738	840	31.839	203.236	3868.7	32.2392	4.24375	3.88231
	Arouca	40.9312	-8.25492	340	31.9425	112.784	2146.9	17.8909	7.26279	6.64422
	Arouca	40.9269	-8.26105	270	31.9396	105.57	2009.58	16.7465	7.72634	7.06828
	Figueira de Castelo Rodrigo / V.Torpim	40.8303	-6.94083	635	31.8729	191.999	3654.8	30.4567	4.46407	4.08386
	Guarda	40.5286	-7.27867	1020	31.6647	208.185	3962.92	33.0243	4.15426	3.80044
	Nelas	40.5235	-7.85547	425	31.6612	184.072	3503.91	29.1992	4.63567	4.24085
	Pampilhosa da Serra	40.1455	-7.92707	835.588	31.4004	204.061	3884.41	32.3701	4.22853	3.86839
	Covilhã	40.2643	-7.48221	482	31.4824	208.505	3968.99	33.075	4.14863	3.79529
	Aldeia Souto / Quinta Lageosa	40.3543	-7.38931	468	31.5444	190.456	3625.44	30.212	4.49634	4.11339
	Lousã / Aeródromo	40.144	-8.24476	193.769	31.3993	176.018	3350.6	27.9216	4.82585	4.41483
	Aveiro / Universidade	40.6354	-8.65961	5	31.7384	186.246	3545.3	29.5441	4.58715	4.19646
	Dunas de Mira	40.446	-8.7616	14	31.6077	181.968	3463.87	28.8655	4.68372	4.2848
	Anadia / Estação Vitivinícola da Bairrada	40.4389	-8.43994	45	31.6028	167.927	3196.57	26.6381	5.03528	4.60642
	Coimbra / Bencanta	40.2135	-8.45515	35	31.4473	179.487	3416.64	28.472	4.74183	4.33797
	Figueira da Foz / Vila Verde	40.1398	-8.80594	4	31.3964	193.677	3686.75	30.7229	4.42954	4.05228
	Ansião	39.8976	-8.40997	396.241	31.2293	184.793	3517.63	29.3136	4.61946	4.22602
	Leiria / Aeródromo	39.7806	-8.82097	45	31.1486	179.765	3421.92	28.516	4.73525	4.33195
	São Pedro de Moel	39.7636	-9.03059	40	31.1369	197.041	3750.78	31.2565	4.3621	3.99058
	Tomar / Vale Donas	39.5921	-8.37395	75.421	31.0186	192.729	3668.7	30.5725	4.44897	4.07005
	Alcobaça / Estação Fruticultura Vieira Natividade	39.548	-8.96932	38	30.9881	191.106	3637.81	30.3151	4.48268	4.10089
	Rio Maior / ETAR	39.3139	-8.9236	52.832	30.8266	187.786	3574.62	29.7885	4.55345	4.16564
	Santarém / Fonte Boa Est. Zootécnica	39.2013	-8.73681	71.911	30.7489	184.056	3503.6	29.1967	4.63603	4.24118
	Torres Vedras / Dois Portos	39.0439	-9.179	110	30.6403	188.548	3589.11	29.9093	4.537	4.15058
	Coruche / Estação de Regadio (INIA)	38.9416	-8.51312	18.754	30.5697	205.278	3907.57	32.5631	4.20631	3.84806
	Santa Cruz / Aeródromo	39.1257	-9.37887	40.705	30.6967	205.977	3920.88	32.674	4.19365	3.83648
	Cabo da Roca	38.7816	-9.49754	141.231	30.4593	198.531	3779.15	31.4929	4.33296	3.96392
	Lisboa / Tapada da Ajuda	38.7097	-9.18276	69.956	30.4097	190.857	3633.07	30.2755	4.48791	4.10567
	Cabo Raso / Farol	38.709	-9.48536	7.879	30.4092	211.208	4020.45	33.5038	4.10167	3.75233
	Barreiro / Lavradio	38.6745	-9.04762	6	30.3854	182.659	3477.01	28.9751	4.66782	4.27026
	Pegões	38.6508	-8.63503	64	30.369	200.493	3816.49	31.8041	4.29525	3.92943
	Setúbal / Estação de Fruticultura	38.5485	-8.89078	35	30.2985	199.112	3790.21	31.5851	4.32171	3.95363
	Almada / Praia da Rainha	38.617	-9.21287	5.508	30.3457	195.401	3719.55	30.9963	4.3947	4.0204
	Alcácer do Sal - Barrosinha	38.3636	-8.48157	29	30.1709	199.563	3798.8	31.6566	4.31302	3.94568
	Alvalade	37.9468	-8.39439	46.972	29.8833	192.424	3662.89	30.5241	4.45526	4.07581
	Zambujeira	37.582	-8.74287	67	29.6316	189.659	3610.26	30.0855	4.51323	4.12884
	Aljezur	37.3255	-8.80164	11.954	29.4546	206.576	3932.28	32.769	4.18288	3.82663
	Foía	37.3143	-8.59574	895.302	29.4469	204.282	3888.61	32.4051	4.22448	3.86468
	Sabugal / Martim Rei	40.3392	-7.03693	858	31.534	208.976	3977.97	33.1498	4.14034	3.78771
	Zebreira	39.8496	-7.06858	374	31.1962	200.172	3810.38	31.7532	4.30137	3.93502
	Proença-a-Nova / Moitas	39.7286	-7.87056	379	31.1127	204.727	3897.08	32.4757	4.21634	3.85723
	Alvega	39.4611	-8.02698	51.048	30.9281	197.056	3751.06	31.2588	4.36181	3.99032
	Avis / Benavila	39.1068	-7.87751	152.253	30.6837	197.542	3760.31	31.3359	4.35226	3.98158
	Mora	38.9407	-8.164	129.45	30.5691	165.454	3149.51	26.2459	5.10336	4.6687
	Elvas / Est. Melhoramento Plantas	38.8896	-7.14093	209.969	30.5338	206.005	3921.41	32.6785	4.19315	3.83602
	Estremoz / Techocas	38.8621	-7.51276	366	30.5149	211.653	4028.92	33.5744	4.09405	3.74536
	Reguengos / S.Pedro do Corval	38.4848	-7.47294	265.168	30.2545	193.613	3685.54	30.7128	4.43084	4.05346
	Viana do Alentejo	38.3319	-8.04554	202	30.149	194.632	3704.92	30.8743	4.41017	4.03455
	Amareleja	38.205	-7.21286	192	30.0614	191.443	3644.22	30.3685	4.47563	4.09444
	Amareleja	38.2007	-7.2261	180	30.0585	166.563	3170.62	26.4218	5.07258	4.64055
	Mértola / Vale Formoso	37.7575	-7.55152	190	29.7527	204.189	3886.85	32.3904	4.22617	3.86623
	Castro Verde / Neves Corvo	37.5765	-7.97223	225	29.6278	199.987	3806.86	31.7238	4.3049	3.93825
	Castro Marim / Reserva Nacional do Sapal	37.2296	-7.42591	4.832	29.3884	217.107	4132.76	34.4396	4.00323	3.66228
	Portimão / Aeródromo	37.1475	-8.58328	2	29.3318	210.25	4002.21	33.3518	4.11817	3.76743
	*Conversion up-dated on 30 of November 2023
